# Supplementary material for: Overexpressed BSR1-Mediated Enhancement of Disease Resistance Depends on the MAMP-Recognition System
Source: MDPI journal article supplement (doi:10.3390/ijms21155397), 2020-07-29
Supplement: s1 [file s1]

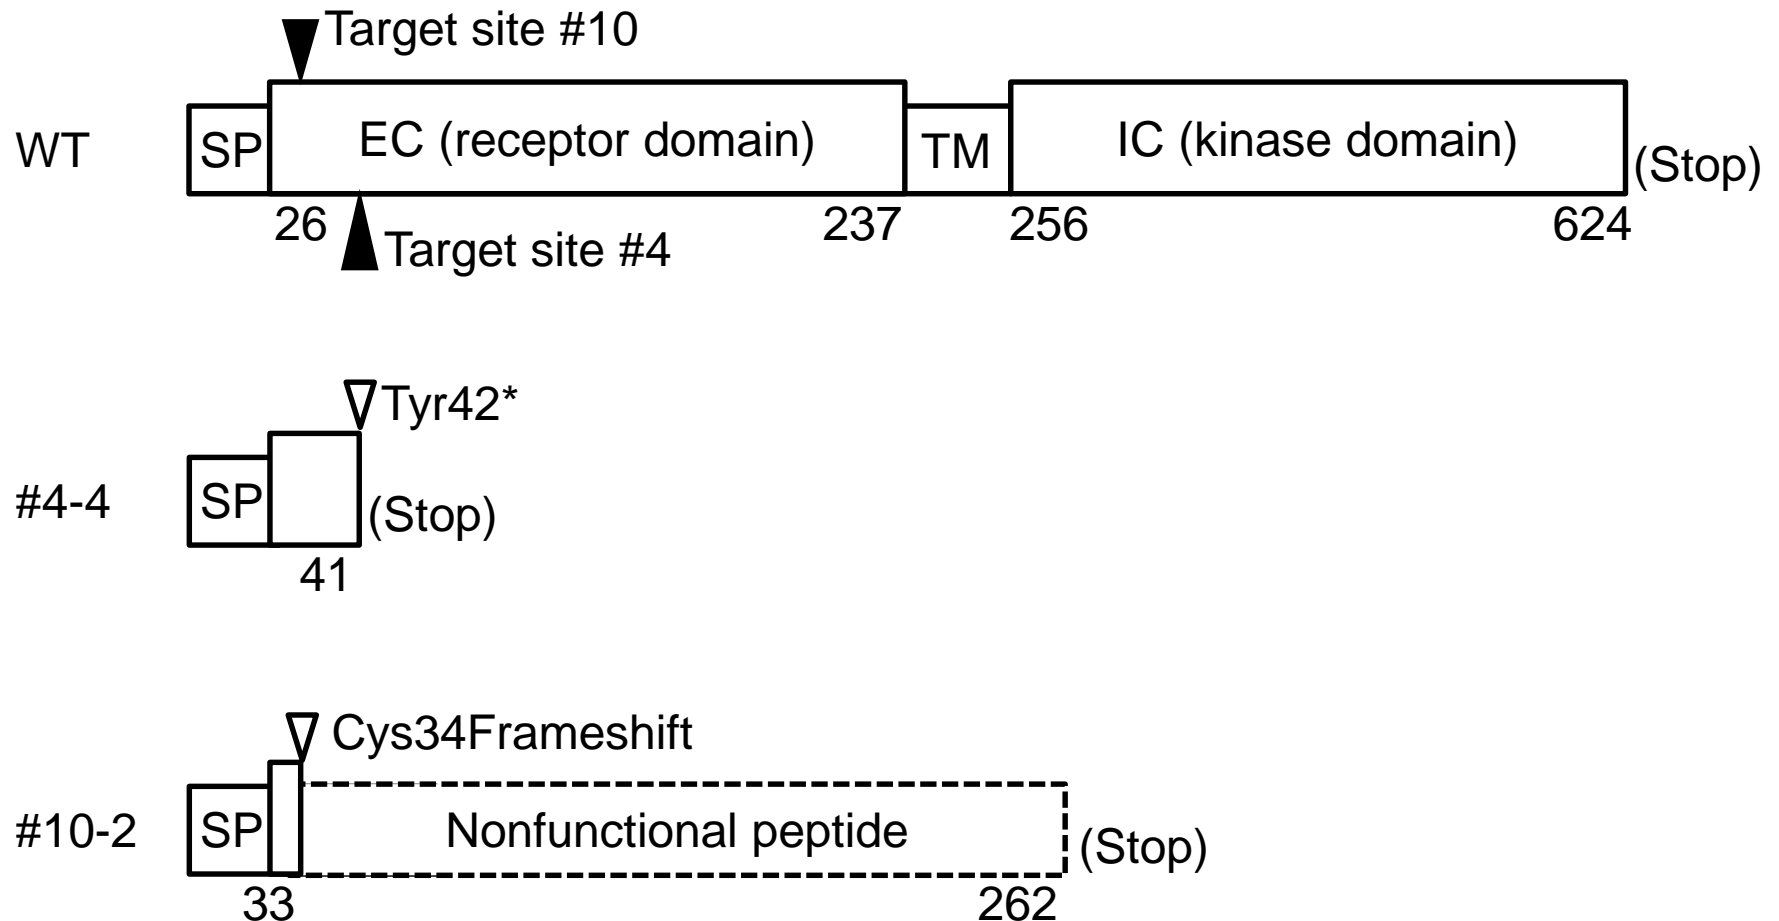

**Figure S1.** Schematic structure of the translation products of wild-type *OsCERK1* and mutated *OsCERK1*. Numerals under boxes indicate the number of amino acid residues. Black arrowheads, positions corresponding to CRISPR/Cas9 system-targeted sites; white arrowheads, insertion mutation-mediated amino acid substitution; SP, signal peptide; EC, extracellular domain; TM, transmembrane domain; IC, intracellular domain; Stop, stop codon.

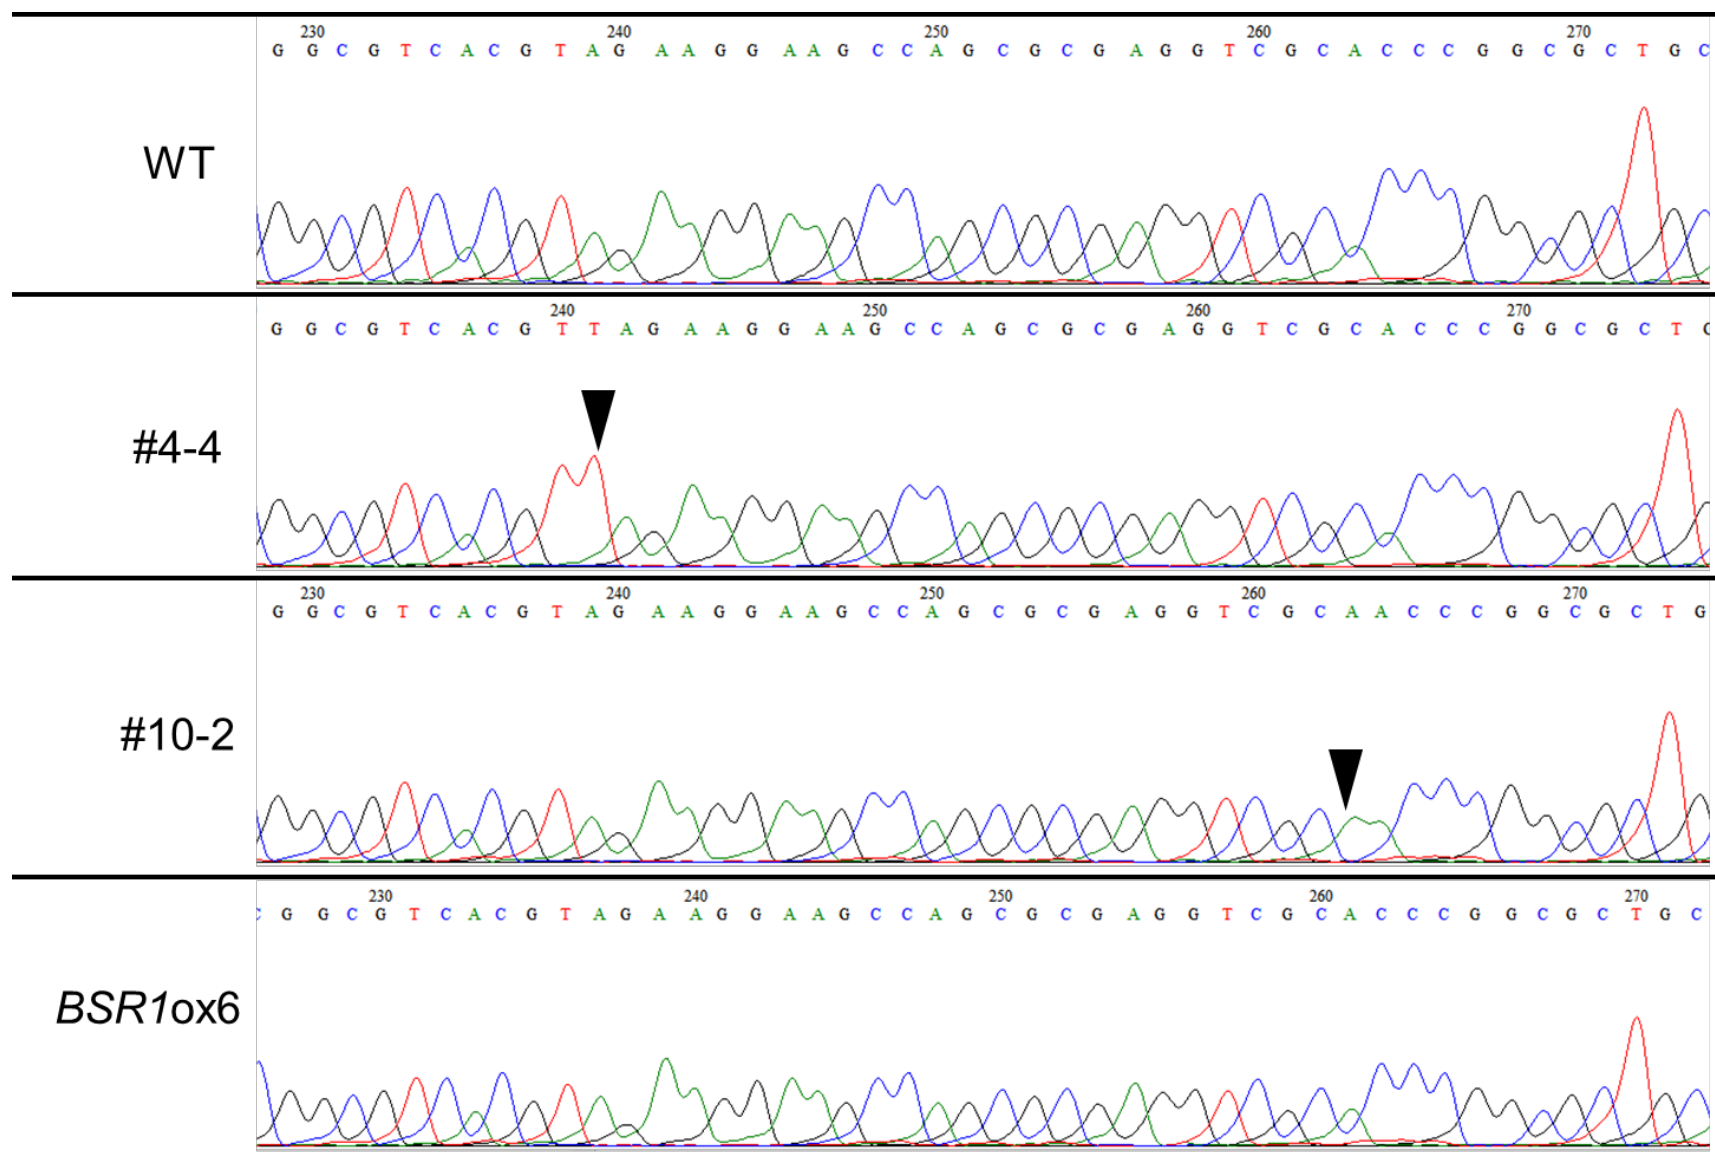

**Figure S2.** Sequences of *OsCERK1* transcript in WT, *OsCERK1*ko:BSR1ox lines, and BSR1ox6. Complementary strand was sequenced after reverse-transcription reaction. Black arrowheads, CRISPR/Cas9 system-mediated insertion mutations.

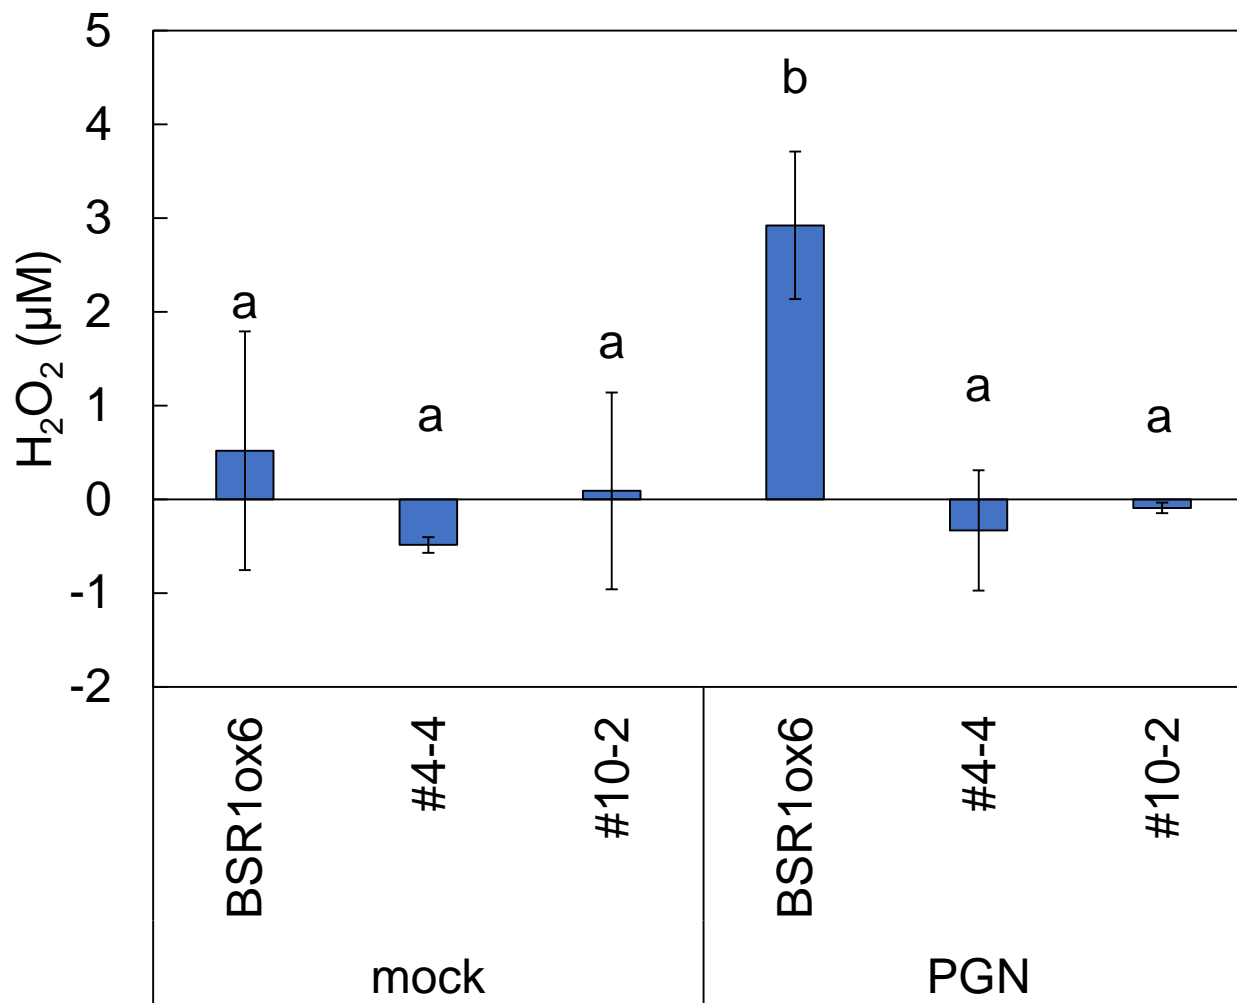

**Figure S3.** Knockout of *OsCERK1* suppressed peptidoglycan-triggered  $H_2O_2$  production in the *BSR1*-overexpressing background.  $H_2O_2$  concentrations were measured by luminol-dependent chemiluminescence assay at 120 min after treatment. Values are presented as the means  $\pm$  standard deviations of three biological replicates. Experiments were conducted twice, with similar results. Different letters indicate significant differences (Tukey's test;  $p < 0.05$ ). Mock, treatment with water; PGN, treatment with peptidoglycan.

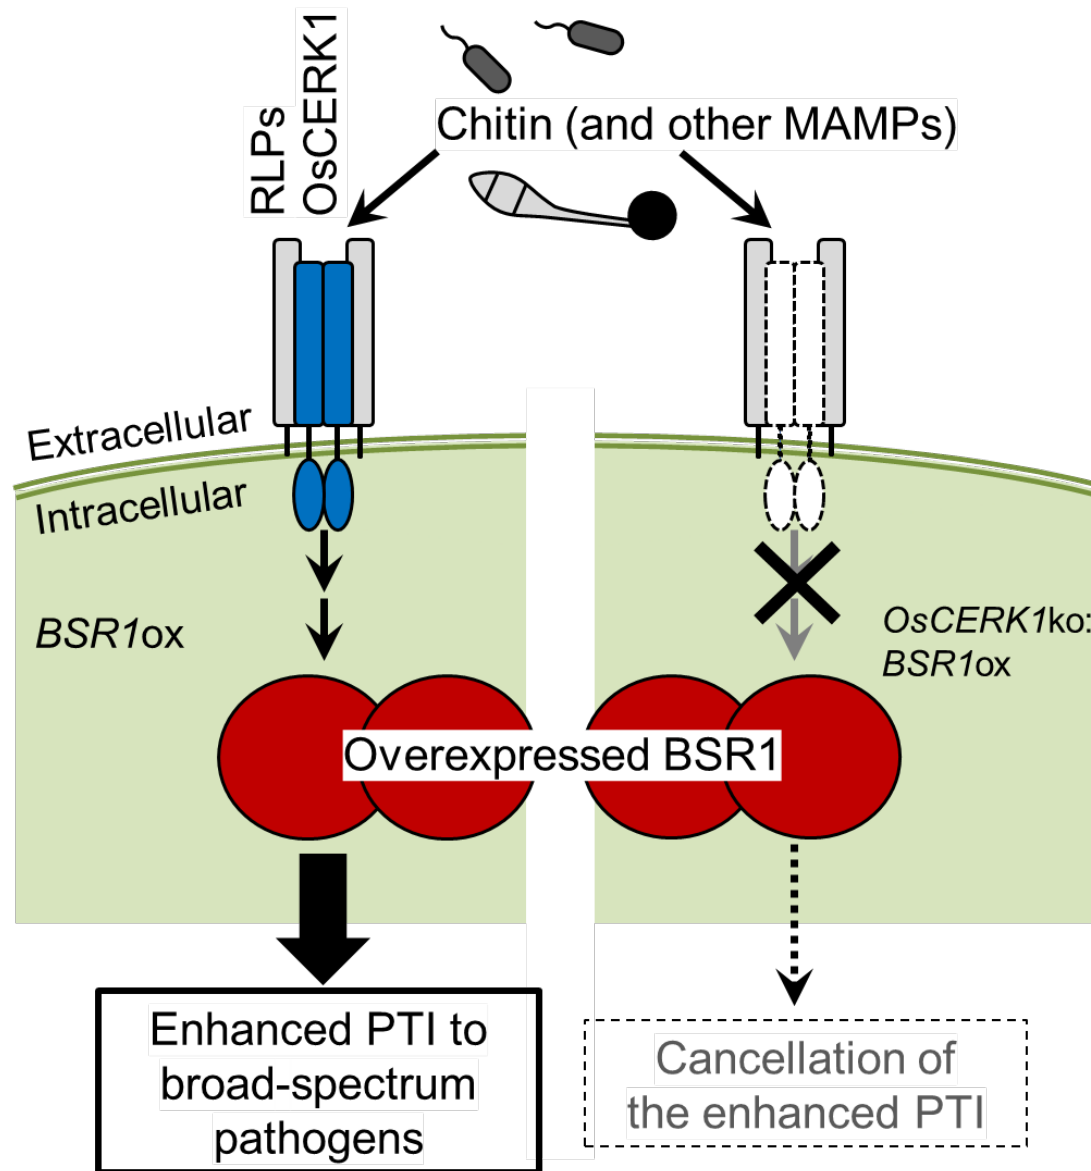

**Figure S4.** The enhancement of disease resistance by *BSR1* overexpression depends on *OsCERK1*. RLPs, receptor-like proteins; MAMPs, microbe-associated molecular patterns; PTI, pattern-triggered immunity.
